# Supplementary material
Source: publisher site journal article supplement (https://www.dovepress.com/article/305513)
Supplement: Supplementary file 1 [file get_supplementary_file.php]

## Supplementary files

**Supplementary Table 1.** Characteristics of patients approached for enrollment\*

| Characteristic                                     | Approached<br>for inclusion<br>(n = 2722) | All Enrolled<br>(n = 2026) |
|----------------------------------------------------|-------------------------------------------|----------------------------|
| Age at screening, y                                |                                           |                            |
| Mean (SD)                                          | 55 (15)                                   | 54 (15)                    |
| Median (range)                                     | 56 (45, 64)                               | 55 (45, 64)                |
| Female, %                                          | 69                                        | 70                         |
| Insurance, %                                       |                                           |                            |
| Commercial                                         | 57                                        | 60                         |
| Medicare                                           | 25                                        | 23                         |
| Medicaid                                           | 10                                        | 10                         |
| Other†                                             | 6                                         | 6                          |
| Uninsured                                          | 2                                         | 2                          |
| Screening/enrollment treatment class‡, %           |                                           |                            |
| Uncontrolled on high-dosage ICS/LABA only          | 38                                        | 30                         |
| Any monoclonal antibody                            | 57                                        | 64                         |
| Systemic corticosteroids or immunosuppressant      | 13                                        | 14                         |
| Exacerbations during 12 months prior to enrollment |                                           |                            |
| Confirmed exacerbations per patient, mean          | 1.4                                       | 1.3                        |

\*Percentages may not total 100% as a result of rounding.

†"Other" includes "other government insurance" and "other."

‡Use of systemic corticosteroids or other systemic immunosuppressants for  $\geq 50\%$  of the prior 12 months. Treatment groups for biologics and systemic corticosteroids or immunosuppressants were not mutually exclusive.

Abbreviations: BMI, body mass index; ICS, inhaled corticosteroid; LABA, long-acting beta agonist; SD, standard deviation.

**Supplementary Table 2.** Characteristics of patients by PRO completion status\*

| <b>Characteristic</b>                    | <b>Did not complete enrollment PROs<br/>(n = 775)</b> | <b>Completed enrollment PROs<br/>(n = 1109)</b> |
|------------------------------------------|-------------------------------------------------------|-------------------------------------------------|
| Age at enrollment, y                     |                                                       |                                                 |
| Mean (SD)                                | 55 (14)                                               | 54 (14)                                         |
| Median (range)                           | 56 (18, 92)                                           | 55 (18, 86)                                     |
| Female, %                                | 68                                                    | 70                                              |
| Race, %                                  |                                                       |                                                 |
| White                                    | 69                                                    | 80                                              |
| Black                                    | 23                                                    | 15                                              |
| Other                                    | 5                                                     | 4                                               |
| Not reported                             | 3                                                     | 1                                               |
| Hispanic or Latino ethnicity, %          |                                                       |                                                 |
| Hispanic or Latino                       | 11                                                    | 7                                               |
| Not Hispanic or Latino                   | 89                                                    | 93                                              |
| BMI, kg/m <sup>2</sup>                   |                                                       |                                                 |
| Mean (SD)                                | 33 (8)                                                | 33 (9)                                          |
| Median (range)                           | 32 (16, 65)                                           | 32 (9, 109)                                     |
| Care by subspecialist at site, %         |                                                       |                                                 |
| Allergist/immunologist                   | 34                                                    | 43                                              |
| Pulmonologist                            | 58                                                    | 47                                              |
| Allergist/immunologist and pulmonologist | 8                                                     | 10                                              |
| Insurance, %                             |                                                       |                                                 |
| Commercial                               | 55                                                    | 64                                              |
| Medicare                                 | 24                                                    | 23                                              |
| Medicaid                                 | 14                                                    | 7                                               |

|                                     |    |    |
|-------------------------------------|----|----|
| Other <sup>†</sup>                  | 5  | 6  |
| Uninsured                           | 1  | 1  |
| Residential area, %                 |    |    |
| Suburban                            | 47 | 52 |
| Urban                               | 27 | 25 |
| Rural                               | 20 | 20 |
| Missing                             | 5  | 3  |
| Smoking status, %                   |    |    |
| Never                               | 64 | 68 |
| Former                              | 32 | 29 |
| Current                             | 4  | 3  |
| Employment status, %                |    |    |
| Employed full-time                  | 36 | 42 |
| Employed part-time                  | 5  | 6  |
| Self-employed                       | 3  | 4  |
| Homemaker                           | 3  | 3  |
| Full-time student                   | 1  | 2  |
| Retired                             | 23 | 22 |
| Disabled due to asthma              | 8  | 8  |
| Disabled due to nonasthma condition | 8  | 6  |
| Unemployed <sup>‡</sup>             | 7  | 5  |
| Missing                             | 6  | 3  |
| Education level, %                  |    |    |
| Some high school or less            | 7  | 3  |
| Graduated high school               | 25 | 21 |
| College                             | 42 | 48 |
| Graduate school                     | 15 | 19 |
| Missing                             | 10 | 8  |

|                                                       |     |     |
|-------------------------------------------------------|-----|-----|
| Screening/enrollment treatment class <sup>§</sup> , % |     |     |
| Uncontrolled on high-dosage ICS/LABA only             | 33  | 28  |
| Any monoclonal antibody                               | 61  | 67  |
| Omalizumab                                            | 28  | 34  |
| Non-omalizumab                                        | 32  | 32  |
| Systemic corticosteroids or immunosuppressant         | 15  | 13  |
| Exacerbations during 12 months prior to enrollment    |     |     |
| Confirmed exacerbations per patient, mean             | 1.3 | 1.1 |

\*Percentages may not total 100% as a result of rounding.

†"Other" includes "other government insurance" and "other."

‡"Unemployed" does not include retired, disabled, or homemaker.

§Use of systemic corticosteroids or other systemic immunosuppressants for  $\geq 50\%$  of the prior 12 months. Treatment groups for biologics and systemic corticosteroids or immunosuppressants were not mutually exclusive.

Abbreviations: BMI, body mass index; ICS, inhaled corticosteroid; LABA, long-acting beta agonist; SD, standard deviation.

**Supplementary Table 3. Mean (SD) SGRQ total summary scores\* by subgroups**

|                                                                                                                      | <b>Total score,<br/>mean (SD)</b> |
|----------------------------------------------------------------------------------------------------------------------|-----------------------------------|
| <b>Patients not receiving biologics or SCS during the study</b>                                                      |                                   |
| <b>Highest blood eosinophil count, cells/<math>\mu</math>L</b>                                                       |                                   |
| < 150 (n = 180)                                                                                                      | n = 72<br>47 (20)                 |
| 150 to < 300 (n = 142)                                                                                               | n = 59<br>46 (21)                 |
| $\geq$ 300 (n = 322)                                                                                                 | n = 65<br>48 (24)                 |
| <b>Highest total IgE level, IU/mL</b>                                                                                |                                   |
| < 30 (n = 41)                                                                                                        | n = 14<br>50 (18)                 |
| 30 to 700 (n = 179)                                                                                                  | n = 45<br>46 (21)                 |
| > 700 (n = 46)                                                                                                       | n = 17<br>49 (23)                 |
| <b>Patients with continuous biologic use for <math>\geq</math> 12 months prior to enrollment</b>                     |                                   |
| <b>Exacerbation rate in year prior to enrollment</b>                                                                 |                                   |
| No exacerbations (n = 478)                                                                                           | n = 311<br>34 (21)                |
| Exacerbation rate $\geq$ 1 per year (n = 131)                                                                        | n = 74<br>47 (22)                 |
| <b>HCP control assessment</b>                                                                                        |                                   |
| Controlled (n = 414)                                                                                                 | n = 282<br>32 (21)                |
| Not controlled (n = 194)                                                                                             | n = 103<br>46 (22)                |
| <b>Clinical remission status among patients receiving biologics for <math>\geq</math> 12 months during the study</b> |                                   |
| Meeting criteria (n = 69)                                                                                            | n = 67<br>13 (12)                 |
| Not meeting criteria (n = 465)                                                                                       | n = 446<br>39 (22)                |

\*Scores range from 0 (perfect health) to 100 (maximum impairment).

Abbreviations: HD ICS+, high-dosage inhaled corticosteroids and additional controllers without biologics or maintenance systemic corticosteroids, HCP, healthcare provider; IgE, immunoglobulin E; SD, standard deviation; SGRQ, Saint George's Respiratory Questionnaire.

Supplementary Table 4. Mean (SD) WPAI scores by subgroups

|                                                                                                                                   | Percent work time missed | Impairment while working | Overall work impairment* | Activity impairment |
|-----------------------------------------------------------------------------------------------------------------------------------|--------------------------|--------------------------|--------------------------|---------------------|
| <b>Patients not receiving biologics or SCS during the study</b>                                                                   |                          |                          |                          |                     |
| <b>Highest blood eosinophil count, cells/<math>\mu</math>L, mean % (SD)</b>                                                       |                          |                          |                          |                     |
| < 150 (n = 180)                                                                                                                   | n = 44<br>13 (29)        | n = 42<br>27 (27)        | n = 42<br>31 (31)        | n = 78<br>40 (28)   |
| 150 to < 300 (n = 142)                                                                                                            | n = 33<br>12 (21)        | n = 34<br>25 (24)        | n = 33<br>31 (29)        | n = 62<br>29 (27)   |
| $\geq$ 300 (n = 262)                                                                                                              | n = 27<br>2 (8)          | n = 27<br>18 (21)        | n = 27<br>19 (23)        | n = 74<br>35 (30)   |
| <b>Highest total IgE level, IU/mL, mean % (SD)</b>                                                                                |                          |                          |                          |                     |
| < 30 (n = 41)                                                                                                                     | n = 5<br>3 (4)           | n = 5<br>32 (16)         | n = 5<br>34 (15)         | n = 15<br>35 (31)   |
| 30 to 700 (n = 179)                                                                                                               | n = 26<br>11 (24)        | n = 25<br>23 (26)        | n = 25<br>26 (31)        | n = 51<br>34 (30)   |
| > 700 (n = 46)                                                                                                                    | n = 7<br>0 (0)           | n = 7<br>16 (17)         | n = 7<br>16 (17)         | n = 18<br>36 (30)   |
| <b>Patients with continuous biologic use for <math>\geq</math> 12 months prior to enrollment</b>                                  |                          |                          |                          |                     |
| <b>Annual exacerbation rate in year prior to enrollment, mean % (SD)</b>                                                          |                          |                          |                          |                     |
| No exacerbations (n = 478)                                                                                                        | n = 170<br>1 (5)         | n = 170<br>12 (20)       | n = 170<br>13 (21)       | n = 313<br>24 (28)  |
| Exacerbation rate $\geq$ 1 per year (n = 131)                                                                                     | n = 36<br>8 (16)         | n = 36<br>28 (28)        | n = 36<br>32 (31)        | n = 76<br>41 (33)   |
| <b>HCP control assessment, mean % (SD)</b>                                                                                        |                          |                          |                          |                     |
| Controlled (n = 414)                                                                                                              | n = 157<br>2 (7)         | n = 157<br>12 (20)       | n = 157<br>13 (22)       | n = 285<br>23 (28)  |
| Not controlled (n = 194)                                                                                                          | n = 49<br>4 (12)         | n = 49<br>25 (25)        | n = 49<br>27 (27)        | n = 104<br>39 (31)  |
| <b>Clinical remission status among patients receiving biologics for <math>\geq</math> 12 months during the study, mean % (SD)</b> |                          |                          |                          |                     |
| Meeting criteria (n = 69)                                                                                                         | n = 43<br>2 (8)          | n = 43<br>3 (13)         | n = 43<br>5 (15)         | n = 69<br>4 (7)     |
| Not meeting criteria (n = 465)                                                                                                    | n = 230<br>5 (17)        | n = 226<br>16 (21)       | n = 226<br>19 (24)       | n = 458<br>28 (29)  |

\*Overall work impairment is the sum of (a) work hours missed and (b) hours worked multiplied by impairment while working because of asthma.(20)

Abbreviations: HD ICS+, high-dosage inhaled corticosteroids and additional controllers without biologics or maintenance systemic corticosteroids, HCP, healthcare provider; IgE, immunoglobulin E; SD, standard deviation; WPAI, Work Productivity and Activity Impairment.
